# Supplementary material for: Comparison of miRNAs and Their Targets in Seed Development between Two Maize Inbred Lines by High-Throughput Sequencing and Degradome Analysis
Source: PLoS One. 2016 Jul 27;11(7):e0159810. doi: 10.1371/journal.pone.0159810 (PMC4962988; doi:10.1371/journal.pone.0159810)
Supplement: S5 Table — (XLSX) [file pone.0159810.s005.xlsx]

## Sheet: Table S5
S4 Table. Targets of identified miRNAs in the PH6WC and PH4CV degradome libraries.
Family	Group[1]	miRNA Name[2]	miRNA Sequence	Target Transcript	Alignment Score	Alignment Range	Cleavage Site	PH6WC Category[3]	PH4CV Category[3]	Transcript Annotation	GO Term	KEGG Pathway
miR156	Con-K	zma-miR156a,b,c,d,e,f,g,l-5p	TGACAGAAGAGAGTGAGCAC	GRMZM2G126827_T01	2	927-946	937	2	0	SBP12; Squamosa promoter-binding protein-like (SBP domain) transcription factor family protein	GO:0003677(DNA binding);GO:0005634(nucleus)	-
				GRMZM2G156621_T01	2	859-878	869	2	0	Squamosa promoter-binding protein-like (SBP domain) transcription factor family protein	GO:0003677(DNA binding);GO:0005634(nucleus)	-
		zma-miR156j_R-1-5p	TGACAGAAGAGAGAGAGCAC	GRMZM2G126827_T01	1	927-946	937	2	0	SBP12; Squamosa promoter-binding protein-like (SBP domain) transcription factor family protein	GO:0003677(DNA binding);GO:0005634(nucleus)	-
				GRMZM2G156621_T01	1	859-878	869	2	0	Squamosa promoter-binding protein-like (SBP domain) transcription factor family protein	GO:0003677(DNA binding);GO:0005634(nucleus)	-
miR159	Con-K	zma-miR159a,f-3p	TTTGGATTGAAGGGAGCTCTG	GRMZM2G028054_T01	3	1693-1713	1704	-	2	Putative MYB DNA-binding domain superfamily protein isoform 1	GO:0003682(chromatin binding)	-
				GRMZM2G028054_T02	3	1693-1713	1704	-	2	Putative MYB DNA-binding domain superfamily protein isoform 2	GO:0003682(chromatin binding)	-
				GRMZM2G028054_T03	3	1693-1713	1704	-	2	Putative MYB DNA-binding domain superfamily protein isoform 3	GO:0003682(chromatin binding)	-
		zma-miR159c_L-1R-1-3p	TTGGATTGAAGGGAGCTCC	GRMZM2G020805_T01	3.5	1430-1448	1439	1	0	TCP family transcription factor, putative, expressed	-	-
				GRMZM2G028054_T01	2	1694-1712	1703	4	0	Putative MYB DNA-binding domain superfamily protein isoform 1	GO:0003682(chromatin binding)	-
				GRMZM2G028054_T02	2	1694-1712	1703	4	0	Putative MYB DNA-binding domain superfamily protein isoform 2	GO:0003682(chromatin binding)	-
				GRMZM2G028054_T03	2	1694-1712	1703	4	0	Putative MYB DNA-binding domain superfamily protein isoform 3	GO:0003682(chromatin binding)	-
	Con-N	osa-miR159f_R-1	CTTGGATTGAAGGGAGCTCT	GRMZM2G028054_T01	3.5	1694-1713	1704	-	2	Putative MYB DNA-binding domain superfamily protein isoform 1	GO:0003682(chromatin binding)	-
				GRMZM2G028054_T02	3.5	1694-1713	1704	-	2	Putative MYB DNA-binding domain superfamily protein isoform 2	GO:0003682(chromatin binding)	-
				GRMZM2G028054_T03	3.5	1694-1713	1704	-	2	Putative MYB DNA-binding domain superfamily protein isoform 3	GO:0003682(chromatin binding)	-
		osa-miR159f_1ss1CT	TTTGGATTGAAGGGAGCTCTA	GRMZM2G028054_T01	2.5	1693-1713	1704	-	2	Putative MYB DNA-binding domain superfamily protein isoform 1	GO:0003682(chromatin binding)	-
				GRMZM2G028054_T02	2.5	1693-1713	1704	-	2	Putative MYB DNA-binding domain superfamily protein isoform 2	GO:0003682(chromatin binding)	-
				GRMZM2G028054_T03	2.5	1693-1713	1704	-	2	Putative MYB DNA-binding domain superfamily protein isoform 3	GO:0003682(chromatin binding)	-
miR164	Con-K	zma-miR164e-5p	TGGAGAAGCAGGACACGTGAG	GRMZM2G029385_T01	3.5	148-167	158	-	4	Import inner membrane translocase subunit TIM14	-	-
miR166	Con-K	zma-miR166a-3p_1ss21CT	TCGGACCAGGCTTCATTCCCT	GRMZM2G038198_T01	4	485-505	496	0	1	START domain containing protein	GO:0003735(structural constituent of ribosome);GO:0006412(translation);GO:0005840(ribosome)	-
		zma-miR166b,d,e,g,h,i-3p	TCGGACCAGGCTTCATTCCCC	GRMZM2G038198_T01	4	485-505	496	0	1	START domain containing protein	GO:0003735(structural constituent of ribosome);GO:0006412(translation);GO:0005840(ribosome)	-
		zma-miR166j,k,n-3p	TCGGACCAGGCTTCAATCCCT	GRMZM2G038198_T01	3.5	486-505	496	0	1	START domain containing protein	GO:0003735(structural constituent of ribosome);GO:0006412(translation);GO:0005840(ribosome)	-
		zma-miR166m_R-2-3p	TCGGACCAGGCTTCATTCC	GRMZM2G008359_T01	4	593-611	602	0	2	CAMK_KIN1/SNF1/Nim1_like.3 - CAMK includes calcium/calmodulin depedent protein kinases	GO:0004672(protein kinase activity);GO:0005524(ATP binding);GO:0006468(protein phosphorylation)	-
				GRMZM2G038198_T01	2	487-505	496	0	1	START domain containing protein	GO:0003735(structural constituent of ribosome);GO:0006412(translation);GO:0005840(ribosome)	-
				GRMZM2G054537_T01	4	1059-1077	1068	-	2	DAG protein	-	-
	Con-N	osa-miR166e_1ss17TC-3p	TCGGACCAGGCTTCATCCCCC	GRMZM2G038198_T01	3.5	485-505	496	0	1	START domain containing protein	GO:0003735(structural constituent of ribosome);GO:0006412(translation);GO:0005840(ribosome)	-
		osa-miR166e_R-2_1ss19CT-3p	TCGGACCAGGCTTCATTCT	GRMZM2G038198_T01	2.5	487-505	496	0	1	START domain containing protein	GO:0003735(structural constituent of ribosome);GO:0006412(translation);GO:0005840(ribosome)	-
		osa-miR166m_R-2_1ss17TC	TCGGACCAGGCTTCATCCC	GRMZM2G000423_T01	4	854-872	863	-	2	Leucoanthocyanidin dioxygenase	GO:0016491(oxidoreductase activity);GO:0016706(oxidoreductase activity, acting on paired donors, with incorporation or reduction of molecular oxygen, 2-oxoglutarate as one donor, and incorporation of one atom each of oxygen into both donors);GO:0055114(oxidation-reduction process)	-
				GRMZM2G000423_T02	4	762-780	771	-	2	Leucoanthocyanidin dioxygenase	GO:0016491(oxidoreductase activity);GO:0016706(oxidoreductase activity, acting on paired donors, with incorporation or reduction of molecular oxygen, 2-oxoglutarate as one donor, and incorporation of one atom each of oxygen into both donors);GO:0055114(oxidation-reduction process)	-
				GRMZM2G008359_T01	4	593-611	602	0	2	CAMK_KIN1/SNF1/Nim1_like.3 - CAMK includes calcium/calmodulin depedent protein kinases	GO:0004672(protein kinase activity);GO:0005524(ATP binding);GO:0006468(protein phosphorylation)	-
				GRMZM2G038198_T01	1.5	487-505	496	0	1	START domain containing protein	GO:0003735(structural constituent of ribosome);GO:0006412(translation);GO:0005840(ribosome)	-
miR167	Con-K	zma-miR167a_R-1,b_R-1,c_R-1,d_R-1,e_R-1,f_R-1,j_R-1-5p	TGAAGCTGCCAGCATGATCT	GRMZM2G035405_T01	4	1503-1523	1513	0	0	ARF transcription factor, partial	GO:0006355(regulation of transcription, DNA-dependent);GO:0005634(nucleus)	-
				GRMZM2G035405_T02	4	2190-2210	2200	0	0	ARF transcription factor, partial	GO:0006355(regulation of transcription, DNA-dependent);GO:0005634(nucleus);GO:0003677(DNA binding);GO:0009725(response to hormone stimulus)	-
				GRMZM2G042623_T01	2.5	1351-1371	1362	2	2	Pumilio-family RNA binding protein, putative	GO:0003723(RNA binding)	-
				GRMZM2G042623_T02	2.5	1349-1369	1360	2	2	Pumilio-family RNA binding protein, putative	GO:0003723(RNA binding)	-
				GRMZM2G078274_T01	4	2501-2521	2511	2	-	ARF transcription factor, partial	GO:0006355(regulation of transcription, DNA-dependent);GO:0005634(nucleus);GO:0003677(DNA binding);GO:0009725(response to hormone stimulus)	-
				GRMZM2G078274_T02	4	188-208	198	2	-	ARF transcription factor, partial	GO:0006355(regulation of transcription, DNA-dependent);GO:0005634(nucleus)	-
				GRMZM2G078274_T03	4	2501-2521	2511	2	-	ARF transcription factor, partial	GO:0006355(regulation of transcription, DNA-dependent);GO:0005634(nucleus);GO:0003677(DNA binding);GO:0009725(response to hormone stimulus)	-
				GRMZM2G475882_T01	4	2531-2551	2541	2	-	ARF transcription factor, partial	GO:0006355(regulation of transcription, DNA-dependent);GO:0005634(nucleus);GO:0003677(DNA binding);GO:0009725(response to hormone stimulus)	-
				GRMZM2G475882_T02	4	2649-2669	2659	2	-	ARF transcription factor, partial	GO:0006355(regulation of transcription, DNA-dependent);GO:0005634(nucleus);GO:0003677(DNA binding);GO:0009725(response to hormone stimulus)	-
		zma-miR167g_R+1,h_R+1,i_R+1-5p	TGAAGCTGCCAGCATGATCTGG	GRMZM2G042623_T01	2.5	1349-1371	1362	2	2	Pumilio-family RNA binding protein, putative	GO:0003723(RNA binding)	-
				GRMZM2G042623_T02	2.5	1347-1369	1360	2	2	Pumilio-family RNA binding protein, putative	GO:0003723(RNA binding)	-
		zma-miR167g_L+1-3p	AGGTCATGCTGTAGTTTCATC	AC233910.1_FGT004	4	643-662	653	4	2	-	-	-
		zma-miR167h_L+1R+1,i_L+1R+1-3p	AGATCATGTTGCAGCTTCACT	GRMZM2G009808_T01	4	2006-2025	2017	-	2	Aconitate hydratase protein, putative	GO:0008152(metabolic process)	-
	Con-N	tae-miR167c-5p	TGAAGCTGCCAGCATGATCTGC	GRMZM2G042623_T01	3.5	1349-1371	1362	2	2	Pumilio-family RNA binding protein, putative	GO:0003723(RNA binding)	-
				GRMZM2G042623_T02	3.5	1347-1369	1360	2	2	Pumilio-family RNA binding protein, putative	GO:0003723(RNA binding)	-
		bdi-miR167d_R+1_1ss22AG-5p	TGAAGCTGCCAGCATGATCTGGA	GRMZM2G042623_T01	3.5	1348-1371	1362	2	2	Pumilio-family RNA binding protein, putative	GO:0003723(RNA binding)	-
				GRMZM2G042623_T02	3.5	1346-1369	1360	2	2	Pumilio-family RNA binding protein, putative	GO:0003723(RNA binding)	-
miR168	Con-K	zma-miR168a,b-5p	TCGCTTGGTGCAGATCGGGAC	GRMZM2G022213_T01	4	652-673	664	2	4	ZOS3-04 - C2H2 zinc finger protein	-	-
miR169	Con-K	zma-miR169o_R-1-5p	TAGCCAAGAATGACTTGCCT	GRMZM5G838907_T01	3.5	1024-1043	1034	0	-	-	-	-
miR171	Con-K	zma-miR171c_1ss4CT,d,e,n_R+1_1ss12CT-3p	TGATTGAGCCGTGCCAATATC	GRMZM2G037792_T01	1	1322-1342	1333	0	0	GRAS79; GRAS transcription factor	-	-
				GRMZM2G051785_T01	1	677-697	688	0	4	Scarecrow-like 6	-	-
				GRMZM2G110579_T01	1	1078-1098	1089	4	0	GRAS transcription factor, partial	-	-
				GRMZM5G825321_T01	1	507-527	518	0	0	GRAS transcription factor, partial	-	-
				GRMZM5G825321_T02	1	1460-1480	1471	0	0	GRAS transcription factor, partial	-	-
miR319	Con-K	zma-miR319a_R+1,b_R+1,c_R+1,d_R+1-3p	TTGGACTGAAGGGTGCTCCCT	GRMZM2G020805_T01	2	1429-1448	1439	1	0	TCP family transcription factor, putative	-	-
				GRMZM2G028054_T01	2	1692-1712	1703	4	0	Putative MYB DNA-binding domain superfamily protein isoform 1	GO:0003682(chromatin binding)	-
				GRMZM2G028054_T02	2	1692-1712	1703	4	0	Putative MYB DNA-binding domain superfamily protein isoform 2	GO:0003682(chromatin binding)	-
				GRMZM2G028054_T03	2	1692-1712	1703	4	0	Putative MYB DNA-binding domain superfamily protein isoform 3	GO:0003682(chromatin binding)	-
				GRMZM2G412073_T01	3.5	231-251	242	0	-	-	-	-
	Con-N	tae-miR319_R-1	TTGGACTGAAGGGAGCTCCC	GRMZM2G020805_T01	3.5	1429-1448	1439	1	0	TCP family transcription factor, putative	-	-
				GRMZM2G028054_T01	2	1693-1712	1703	4	0	Putative MYB DNA-binding domain superfamily protein isoform 1	GO:0003682(chromatin binding)	-
				GRMZM2G028054_T02	2	1693-1712	1703	4	0	Putative MYB DNA-binding domain superfamily protein isoform 2	GO:0003682(chromatin binding)	-
				GRMZM2G028054_T03	2	1693-1712	1703	4	0	Putative MYB DNA-binding domain superfamily protein isoform 3	GO:0003682(chromatin binding)	-
				GRMZM2G412073_T01	4	232-251	242	0	-	-	-	-
miR393	Con-K	zma-miR393a_L+1R-2,c_L+1R-2-5p	CTCCAAAGGGATCGCATTGAT	GRMZM2G137451_T01	3	1680-1700	1691	0	2	F-box domain and LRR containing protein	-	-
				GRMZM2G137451_T02	3	1975-1995	1986	0	2	F-box domain and LRR containing protein	-	-
				GRMZM5G848945_T02	2.5	1738-1758	1749	0	2	F-box domain and LRR containing protein	-	-
miR394	Con-K	zma-miR394a,b-5p	TTGGCATTCTGTCCACCTCC	GRMZM2G064954_T01	0	1405-1424	1415	2	2	F-box domain containing protein	GO:0005515(protein binding)	-
miR396	Con-K	zma-miR396a,b-5p	TTCCACAGCTTTCTTGAACTG	GRMZM2G018414_T01	3	742-763	753	-	4	GRF transcription factor, partial	GO:0005524(ATP binding);GO:0016818(hydrolase activity, acting on acid anhydrides, in phosphorus-containing anhydrides);GO:0006355(regulation of transcription, DNA-dependent);GO:0005634(nucleus)	-
				GRMZM2G018414_T02	3	480-501	491	-	4	GRF transcription factor, partial	GO:0005524(ATP binding);GO:0016818(hydrolase activity, acting on acid anhydrides, in phosphorus-containing anhydrides);GO:0006355(regulation of transcription, DNA-dependent);GO:0005634(nucleus)	-
				GRMZM2G024293_T01	4	1181-1200	1191	2	0	XPA-binding protein 1	GO:0000166(nucleotide binding)	-
				GRMZM2G024293_T03	4	1035-1054	1045	1	0	XPA-binding protein 1	GO:0000166(nucleotide binding)	-
				GRMZM2G034876_T01	3	662-683	673	2	2	GRF transcription factor, partial	GO:0005524(ATP binding);GO:0016818(hydrolase activity, acting on acid anhydrides, in phosphorus-containing anhydrides);GO:0006355(regulation of transcription, DNA-dependent);GO:0005634(nucleus)	-
				GRMZM2G034876_T02	3	662-683	673	2	2	GRF transcription factor, partial	GO:0005524(ATP binding);GO:0016818(hydrolase activity, acting on acid anhydrides, in phosphorus-containing anhydrides);GO:0006355(regulation of transcription, DNA-dependent);GO:0005634(nucleus)	-
				GRMZM2G034876_T03	3	662-683	673	2	2	GRF transcription factor, partial	GO:0005524(ATP binding);GO:0016818(hydrolase activity, acting on acid anhydrides, in phosphorus-containing anhydrides);GO:0006355(regulation of transcription, DNA-dependent);GO:0005634(nucleus)	-
				GRMZM2G041223_T01	3	887-908	898	0	2	GRF6; GRF transcription factor, partial	GO:0005524(ATP binding);GO:0016818(hydrolase activity, acting on acid anhydrides, in phosphorus-containing anhydrides);GO:0006355(regulation of transcription, DNA-dependent);GO:0005634(nucleus)	-
				GRMZM2G045977_T01	3	801-822	812	0	0	GRF3; GRF transcription factor, partial	GO:0005524(ATP binding);GO:0016818(hydrolase activity, acting on acid anhydrides, in phosphorus-containing anhydrides);GO:0006355(regulation of transcription, DNA-dependent);GO:0005634(nucleus)	-
				GRMZM2G067743_T01	3	661-682	672	-	1	-	-	-
				GRMZM2G067743_T02	3	538-559	549	-	1	-	-	-
				GRMZM2G067743_T03	3	537-558	548	-	1	-	-	-
				GRMZM2G080439_T01	4	2472-2492	2483	-	4	HECT-domain domain containing protein	GO:0004842(ubiquitin-protein ligase activity)	ko04120(Ubiquitin mediated proteolysis);ko04144(Endocytosis)
				GRMZM2G099862_T01	3	690-711	701	-	4	GRF2; GRF transcription factor, partial	GO:0005524(ATP binding);GO:0016818(hydrolase activity, acting on acid anhydrides, in phosphorus-containing anhydrides);GO:0006355(regulation of transcription, DNA-dependent);GO:0005634(nucleus)	-
				GRMZM2G099862_T02	3	557-578	568	-	4	GRF2; GRF transcription factor, partial	GO:0005524(ATP binding);GO:0016818(hydrolase activity, acting on acid anhydrides, in phosphorus-containing anhydrides);GO:0006355(regulation of transcription, DNA-dependent);GO:0005634(nucleus)	-
				GRMZM2G099862_T03	3	643-664	654	-	4	GRF2; GRF transcription factor, partial	GO:0005524(ATP binding);GO:0016818(hydrolase activity, acting on acid anhydrides, in phosphorus-containing anhydrides);GO:0006355(regulation of transcription, DNA-dependent);GO:0005634(nucleus)	-
				GRMZM2G099862_T04	3	444-465	455	-	4	GRF2; GRF transcription factor, partial	GO:0005524(ATP binding);GO:0016818(hydrolase activity, acting on acid anhydrides, in phosphorus-containing anhydrides);GO:0006355(regulation of transcription, DNA-dependent);GO:0005634(nucleus)	-
				GRMZM2G129147_T01	3	639-660	650	0	0	GRF transcription factor, partial	GO:0005524(ATP binding);GO:0016818(hydrolase activity, acting on acid anhydrides, in phosphorus-containing anhydrides);GO:0006355(regulation of transcription, DNA-dependent);GO:0005634(nucleus)	-
				GRMZM2G129147_T02	3	819-840	830	0	0	GRF transcription factor, partial	GO:0005524(ATP binding);GO:0016818(hydrolase activity, acting on acid anhydrides, in phosphorus-containing anhydrides);GO:0006355(regulation of transcription, DNA-dependent);GO:0005634(nucleus)	-
				GRMZM2G149543_T01	3.5	904-924	915	2	0	-	-	-
		zma-miR396c_L-1	TCCACAGGCTTTCTTGAACTG	GRMZM2G018414_T01	1	742-762	753	-	4	GRF transcription factor, partial	GO:0005524(ATP binding);GO:0016818(hydrolase activity, acting on acid anhydrides, in phosphorus-containing anhydrides);GO:0006355(regulation of transcription, DNA-dependent);GO:0005634(nucleus)	-
				GRMZM2G018414_T02	1	480-500	491	-	4	GRF transcription factor, partial	GO:0005524(ATP binding);GO:0016818(hydrolase activity, acting on acid anhydrides, in phosphorus-containing anhydrides);GO:0006355(regulation of transcription, DNA-dependent);GO:0005634(nucleus)	-
				GRMZM2G034876_T01	1	662-682	673	2	2	GRF transcription factor, partial	GO:0005524(ATP binding);GO:0016818(hydrolase activity, acting on acid anhydrides, in phosphorus-containing anhydrides);GO:0006355(regulation of transcription, DNA-dependent);GO:0005634(nucleus)	-
				GRMZM2G034876_T02	1	662-682	673	2	2	GRF transcription factor, partial	GO:0005524(ATP binding);GO:0016818(hydrolase activity, acting on acid anhydrides, in phosphorus-containing anhydrides);GO:0006355(regulation of transcription, DNA-dependent);GO:0005634(nucleus)	-
				GRMZM2G034876_T03	1	662-682	673	2	2	GRF transcription factor, partial	GO:0005524(ATP binding);GO:0016818(hydrolase activity, acting on acid anhydrides, in phosphorus-containing anhydrides);GO:0006355(regulation of transcription, DNA-dependent);GO:0005634(nucleus)	-
				GRMZM2G041223_T01	1	887-907	898	0	2	GRF6; GRF transcription factor, partial	GO:0005524(ATP binding);GO:0016818(hydrolase activity, acting on acid anhydrides, in phosphorus-containing anhydrides);GO:0006355(regulation of transcription, DNA-dependent);GO:0005634(nucleus)	-
				GRMZM2G045977_T01	1	801-821	812	0	0	GRF3; GRF transcription factor, partial	GO:0005524(ATP binding);GO:0016818(hydrolase activity, acting on acid anhydrides, in phosphorus-containing anhydrides);GO:0006355(regulation of transcription, DNA-dependent);GO:0005634(nucleus)	-
				GRMZM2G067743_T01	1	661-681	672	-	1	-	-	-
				GRMZM2G067743_T02	1	538-558	549	-	1	-	-	-
				GRMZM2G067743_T03	1	537-557	548	-	1	-	-	-
				GRMZM2G085038_T01	4	10219-10239	10230	-	2	Putative protein kinase superfamily protein	GO:0004672(protein kinase activity);GO:0006468(protein phosphorylation)	-
				GRMZM2G099862_T01	3	690-710	701	-	4	GRF2; GRF transcription factor, partial	GO:0005524(ATP binding);GO:0016818(hydrolase activity, acting on acid anhydrides, in phosphorus-containing anhydrides);GO:0006355(regulation of transcription, DNA-dependent);GO:0005634(nucleus)	-
				GRMZM2G099862_T02	3	557-577	568	-	4	GRF2; GRF transcription factor, partial	GO:0005524(ATP binding);GO:0016818(hydrolase activity, acting on acid anhydrides, in phosphorus-containing anhydrides);GO:0006355(regulation of transcription, DNA-dependent);GO:0005634(nucleus)	-
				GRMZM2G099862_T03	3	643-663	654	-	4	GRF2; GRF transcription factor, partial	GO:0005524(ATP binding);GO:0016818(hydrolase activity, acting on acid anhydrides, in phosphorus-containing anhydrides);GO:0006355(regulation of transcription, DNA-dependent);GO:0005634(nucleus)	-
				GRMZM2G099862_T04	3	444-464	455	-	4	GRF2; GRF transcription factor, partial	GO:0005524(ATP binding);GO:0016818(hydrolase activity, acting on acid anhydrides, in phosphorus-containing anhydrides);GO:0006355(regulation of transcription, DNA-dependent);GO:0005634(nucleus)	-
				GRMZM2G129147_T01	1	639-659	650	0	0	GRF transcription factor, partial	GO:0005524(ATP binding);GO:0016818(hydrolase activity, acting on acid anhydrides, in phosphorus-containing anhydrides);GO:0006355(regulation of transcription, DNA-dependent);GO:0005634(nucleus)	-
				GRMZM2G129147_T02	1	819-839	830	0	0	GRF transcription factor, partial	GO:0005524(ATP binding);GO:0016818(hydrolase activity, acting on acid anhydrides, in phosphorus-containing anhydrides);GO:0006355(regulation of transcription, DNA-dependent);GO:0005634(nucleus)	-
		zma-miR396e,f-5p	TTCCACAGCTTTCTTGAACTT	GRMZM2G018414_T01	4	742-763	753	-	4	GRF transcription factor, partial	GO:0005524(ATP binding);GO:0016818(hydrolase activity, acting on acid anhydrides, in phosphorus-containing anhydrides);GO:0006355(regulation of transcription, DNA-dependent);GO:0005634(nucleus)	-
				GRMZM2G018414_T02	4	480-501	491	-	4	GRF transcription factor, partial	GO:0005524(ATP binding);GO:0016818(hydrolase activity, acting on acid anhydrides, in phosphorus-containing anhydrides);GO:0006355(regulation of transcription, DNA-dependent);GO:0005634(nucleus)	-
				GRMZM2G034876_T01	4	662-683	673	2	2	GRF transcription factor, partial	GO:0005524(ATP binding);GO:0016818(hydrolase activity, acting on acid anhydrides, in phosphorus-containing anhydrides);GO:0006355(regulation of transcription, DNA-dependent);GO:0005634(nucleus)	-
				GRMZM2G034876_T02	4	662-683	673	2	2	GRF transcription factor, partial	GO:0005524(ATP binding);GO:0016818(hydrolase activity, acting on acid anhydrides, in phosphorus-containing anhydrides);GO:0006355(regulation of transcription, DNA-dependent);GO:0005634(nucleus)	-
				GRMZM2G034876_T03	4	662-683	673	2	2	GRF transcription factor, partial	GO:0005524(ATP binding);GO:0016818(hydrolase activity, acting on acid anhydrides, in phosphorus-containing anhydrides);GO:0006355(regulation of transcription, DNA-dependent);GO:0005634(nucleus)	-
				GRMZM2G041223_T01	4	887-908	898	0	2	GRF6; GRF transcription factor, partial	GO:0005524(ATP binding);GO:0016818(hydrolase activity, acting on acid anhydrides, in phosphorus-containing anhydrides);GO:0006355(regulation of transcription, DNA-dependent);GO:0005634(nucleus)	-
				GRMZM2G045977_T01	4	801-822	812	0	0	GRF3; GRF transcription factor, partial	GO:0005524(ATP binding);GO:0016818(hydrolase activity, acting on acid anhydrides, in phosphorus-containing anhydrides);GO:0006355(regulation of transcription, DNA-dependent);GO:0005634(nucleus)	-
				GRMZM2G067743_T01	4	661-682	672	-	1	-	-	-
				GRMZM2G067743_T02	4	538-559	549	-	1	-	-	-
				GRMZM2G067743_T03	4	537-558	548	-	1	-	-	-
				GRMZM2G099862_T01	4	690-711	701	-	4	GRF2; GRF transcription factor, partial	GO:0005524(ATP binding);GO:0016818(hydrolase activity, acting on acid anhydrides, in phosphorus-containing anhydrides);GO:0006355(regulation of transcription, DNA-dependent);GO:0005634(nucleus)	-
				GRMZM2G099862_T02	4	557-578	568	-	4	GRF2; GRF transcription factor, partial	GO:0005524(ATP binding);GO:0016818(hydrolase activity, acting on acid anhydrides, in phosphorus-containing anhydrides);GO:0006355(regulation of transcription, DNA-dependent);GO:0005634(nucleus)	-
				GRMZM2G099862_T03	4	643-664	654	-	4	GRF2; GRF transcription factor, partial	GO:0005524(ATP binding);GO:0016818(hydrolase activity, acting on acid anhydrides, in phosphorus-containing anhydrides);GO:0006355(regulation of transcription, DNA-dependent);GO:0005634(nucleus)	-
				GRMZM2G099862_T04	4	444-465	455	-	4	GRF2; GRF transcription factor, partial	GO:0005524(ATP binding);GO:0016818(hydrolase activity, acting on acid anhydrides, in phosphorus-containing anhydrides);GO:0006355(regulation of transcription, DNA-dependent);GO:0005634(nucleus)	-
				GRMZM2G104025_T01	4	676-696	687	4	-	60S ribosomal protein L18-3, putative	-	ko03010(Ribosome)
				GRMZM2G104025_T02	4	603-623	614	4	-	60S ribosomal protein L18-3, putative	-	-
				GRMZM2G104025_T03	4	505-525	516	4	-	60S ribosomal protein L18-3, putative	-	-
				GRMZM2G104025_T05	4	857-877	868	4	-	60S ribosomal protein L18-3, putative	-	-
				GRMZM2G104025_T06	4	520-540	531	4	-	-	-	-
				GRMZM2G129147_T01	4	639-660	650	0	0	GRF transcription factor, partial	GO:0005524(ATP binding);GO:0016818(hydrolase activity, acting on acid anhydrides, in phosphorus-containing anhydrides);GO:0006355(regulation of transcription, DNA-dependent);GO:0005634(nucleus)	-
				GRMZM2G129147_T02	4	819-840	830	0	0	GRF transcription factor, partial	GO:0005524(ATP binding);GO:0016818(hydrolase activity, acting on acid anhydrides, in phosphorus-containing anhydrides);GO:0006355(regulation of transcription, DNA-dependent);GO:0005634(nucleus)	-
miR397	Con-K	zma-MIR397b-p5	TTGAGCGCAGCGTTGATGAGC	AC212231.3_FGT003	4	364-384	375	-	4	-	-	-
miR408	Con-K	zma-miR408b	CTGCACTGCCTCTTCCCTGGC	GRMZM2G023847_T01	3	850-870	861	-	4	Plastocyanin-like domain containing protein, putative	GO:0005507(copper ion binding);GO:0009055(electron carrier activity)	-
		zma-miR408a_R+3	CTGCACTGCCTCTTCCCTGGCTCC	GRMZM2G023847_T01	3	848-870	861	-	4	Plastocyanin-like domain containing protein, putative	GO:0005507(copper ion binding);GO:0009055(electron carrier activity)	-
miR444	Con-K	zma-miR444a_1ss12TC,b_1ss12TC	TGCAGTTGTTGCCTCAAGCTT	GRMZM2G001024_T01	2.5	1378-1398	1389	0	0	Putative RING/U-box superfamily protein isoform 3	GO:0046872(metal ion binding)	-
				GRMZM2G001024_T02	2.5	1360-1380	1371	0	0	Putative RING/U-box superfamily protein isoform 1	GO:0046872(metal ion binding)	-
				GRMZM2G001024_T03	2.5	1374-1394	1385	0	0	Putative RING/U-box superfamily protein isoform 2	GO:0046872(metal ion binding)	-
miR827	Con-K	zma-miR827_R-1-3p	TTAGATGACCATCAGCAAAC	GRMZM2G003992_T01	4	946-965	956	2	2	-	-	-
Nov	Nov	PC-5p-19938_42	TTTTAGAATTTTCTGAGGACT	GRMZM2G070765_T01	3.5	2292-2313	2304	-	4	Importin-alpha re-exporter, putative	GO:0005515(protein binding);GO:0006886(intracellular protein transport)	-
		PC-5p-51403_13	TTTGTTTGGTTTGTAGAA	GRMZM2G012319_T02	1.5	4132-4149	4140	4	-	SH3 domain containing protein	GO:0005515(protein binding)	-
		PC-5p-60813_10	TGTTTGAATGTACTAGAGCT	GRMZM2G104268_T01	2	1287-1306	1297	-	4	FAR1-domain family sequence	GO:0016491(oxidoreductase activity);GO:0055114(oxidation-reduction process);GO:0008270(zinc ion binding)	-
		PC-5p-60813_10		GRMZM2G104268_T02	2	1287-1306	1297	-	4	FAR1-domain family sequence	GO:0016491(oxidoreductase activity);GO:0055114(oxidation-reduction process);GO:0008270(zinc ion binding)	-
[1]Group	1. Con: Conserved miRNAs are in Zea mays(zma).
	2. Con-N: Conserved miRNAs are not in Zea mays (zma), but in the selected miRbase [Oryza sativa (osa); Sorghum bicolor (sbi); Triticum aestivum (tae); Hordeum vulgare (hvu); Saccharum officinarum (sof); Aegilops tauschii (ata); Brachypodium distachyon (bdi); Festuca arundinacea (far)].
	3. Nov: Novel miRNAs are not in the selected miRbase [Zea mays (zma); Oryza sativa (osa); Sorghum bicolor (sbi); Triticum aestivum (tae); Hordeum vulgare (hvu); Saccharum officinarum (sof); Aegilops tauschii (ata); Brachypodium distachyon (bdi); Festuca arundinacea (far)].
[2]miRNA Name	1. L-N or L+N mean that the miRNA sequence is N base less or more than known miRNA sequence in the left side.
	2. R-N or R+N mean that the miRNA sequence is N base less or more than known miRNA sequence in the right side.
	3. NssNTA means N substitutin that is T changes to A at position N.
	4. New-stand miRNAs are named as MIR-p5 or MIR-p3.
	5. Red-labelled represents that miRNAs had been verified by qRT-PCR in this study.
[3]Category	1. Category 0, the abundance of degradome sequences (>1) is equal to the maximum value, and there is only one maximum value.
	2. Category 1, the abundance of degradome sequences (>1) is equal to the maximum value, and there is more than one maximum value.
	3. Category 2, the abundance of degradome sequences (>1) is between the maximum and median values.
	4. Category 3, the abundance of degradome sequences (>1) is below the median value.
	5. Category 4, only one degradome sequence is detected.
	6. Red-labelled represents that target transcripts both from PH6WC and PH4CV lines had been detected by degradome sequencing in this study.
